# Supplementary material for: Alcohol Binge-Induced Cardiovascular Dysfunction Involves Endocannabinoid–CB1-R Signaling
Source: PubMed Central journal article supplement — JACC Basic Transl Sci. 2019 Sep 23;4(5):625–37. doi: 10.1016/j.jacbts.2019.05.007 (PMC6872859; doi:10.1016/j.jacbts.2019.05.007), 2019-09-23

*Suppl.Fig.1:* Acute alcohol intoxication-induced cardiac dysfunction recovers by 12 h after alcohol exposure measured by ultrasound.

(A) Representative ultrasound M-mode images of heart left ventricles acquired in mice before and after EtOH binge. (B) Indices of LV function (heart rate, stroke volume, cardiac output, ejection fraction and fractional shortening) in mice before (baseline), and after alcohol gavage (EtOH 3h and EtOH 12h respectively) Data are expressed as mean $\pm$ SEM, n=8; \*p<0.05 vs. baseline.

*Suppl.Fig.2:* Acute alcohol intoxication-induced cardiovascular dysfunction recovers by 12h after alcohol exposure measured by P-V approach.

(A) Systolic indices of LV performance [maximal slope of pressure increment (dP/dtmax), end-systolic pressure, stroke work] in control and alcohol-binged (EtOH 12h) mice 12h after maltodextrin or alcohol gavage respectively. (B) Load-independent indices of LV performance: Ees, the dP/dtmax -end-diastolic volume (EDV) relation and preload recruitable stroke work (PRSW). (C) Mean arterial blood pressure and total peripheral resistance measured in control and alcohol-binged (EtOH 12h) mice 12h after maltodextrin or alcohol ingestion respectively. Data are expressed as mean $\pm$ SEM, n=4-6, except for PRSW in panel B, where data are shown as median  $\pm$  25th, 75th percentiles.

*Suppl.Fig.3:* Binge alcohol drinking induces left ventricular and vascular dysfunction in both genders.

(A) Systolic indices of LV performance [maximal slope of pressure increment ( $dP/dt_{max}$ ), end-systolic pressure, stroke work, cardiac output and ejection fraction] in control and alcohol-binged male and female mice 3h after maltodextrin or alcohol gavage. (B) Load-independent indices of LV performance:  $E_{es}$ , the  $dP/dt_{max}$ -end-diastolic volume (EDV) relation and preload recruitable stroke work (PRSW). (C) Binge alcohol-induced changes of mean arterial blood pressure and total peripheral resistance measured in control and alcohol-binged male and female mice. Data are expressed as mean $\pm$ SEM, n=5-8; \* $p$ <0.05 vs. corresponding control group, except for  $dP/dt_{max}$  in panel A, where data are shown as median  $\pm$  25th, 75th percentiles.

*Suppl.Fig.4:* Intravenous vehicle administration has no effect on cardiovascular function.

(A) Representative pressure-volume (P-V) loops of maltodextrin and alcohol-binged mice before (red and dark blue respectively) and 15min after intravenous vehicle (grey and orange loops respectively) injection. (B) Systolic indices of LV performance [maximal slope of pressure increment ( $dP/dt_{max}$ ), end-systolic pressure, stroke work] measured after 3h in control or in alcohol-binged mice before (ctrl base and EtOH base respectively) and 15min after intravenous vehicle (ctrl+veh and EtOH+veh respectively) administration. (C) Mean arterial blood pressure and total peripheral resistance measured after 3h in control or in alcohol-binged mice before (ctrl base and EtOH base respectively) and 15min after intravenous vehicle (ctrl+veh and EtOH+veh respectively) administration. Data are expressed as mean $\pm$ SEM, n=5-7; \* $p$ <0.05 vs. corresponding control group, except for Total peripheral resistance in panel C, where data are shown as median  $\pm$  25th, 75th percentiles.

*Suppl.Fig.5:* Attenuation binge alcohol-induced vascular effects in CB1-R knockout mice. (A) Systolic indices of LV performance [maximal slope of pressure increment (dP/dtmax), end-systolic pressure, stroke work] in control and alcohol-binged CB1<sup>+/+</sup> and CB1<sup>-/-</sup> mice 3h after maltodextrin or alcohol gavage. (C) Binge alcohol-induced changes of mean arterial blood pressure and total peripheral resistance measured in control and alcohol-binged CB1<sup>+/+</sup> and CB1<sup>-/-</sup> mice. Data are expressed as mean±SEM, n=4-5; \*p<0.05 vs. corresponding control group; #p<0.05 vs. alcohol-binged CB1<sup>+/+</sup> group.

*Suppl.Fig.6:* Binge alcohol-induced cardiovascular effects are unaltered in CB2-R knockout mice. (A) Representative P-V loops of alcohol-binged CB2<sup>+/+</sup> and CB2<sup>-/-</sup> mice after gradual preload reduction obtained by vena cava occlusion. Red lines indicate the slope of end-systolic PV relationship, whereas green lines depict the slope of end-diastolic P-V relationship (B) Systolic indices of LV performance [maximal slope of pressure increment (dP/dtmax), end-systolic pressure, stroke work] in control and in alcohol-binged CB2<sup>+/+</sup> and CB2<sup>-/-</sup> mice 3h after maltodextrin or alcohol gavage. (C) Load-independent indices of LV performance [end-systolic elastance (Ees) the dP/dtmax -end-diastolic volume (EDV) relation and preload recruitable stroke work (PRSW)] in control and in alcohol-binged CB2<sup>+/+</sup> and CB2<sup>-/-</sup> mice. (D) Binge alcohol-induced changes of mean arterial blood pressure and total peripheral resistance measured in CB2<sup>+/+</sup> and CB2<sup>-/-</sup> mice. Data are expressed as mean ± SEM, n=4-5; \*p<0.05 vs. corresponding control group.

A

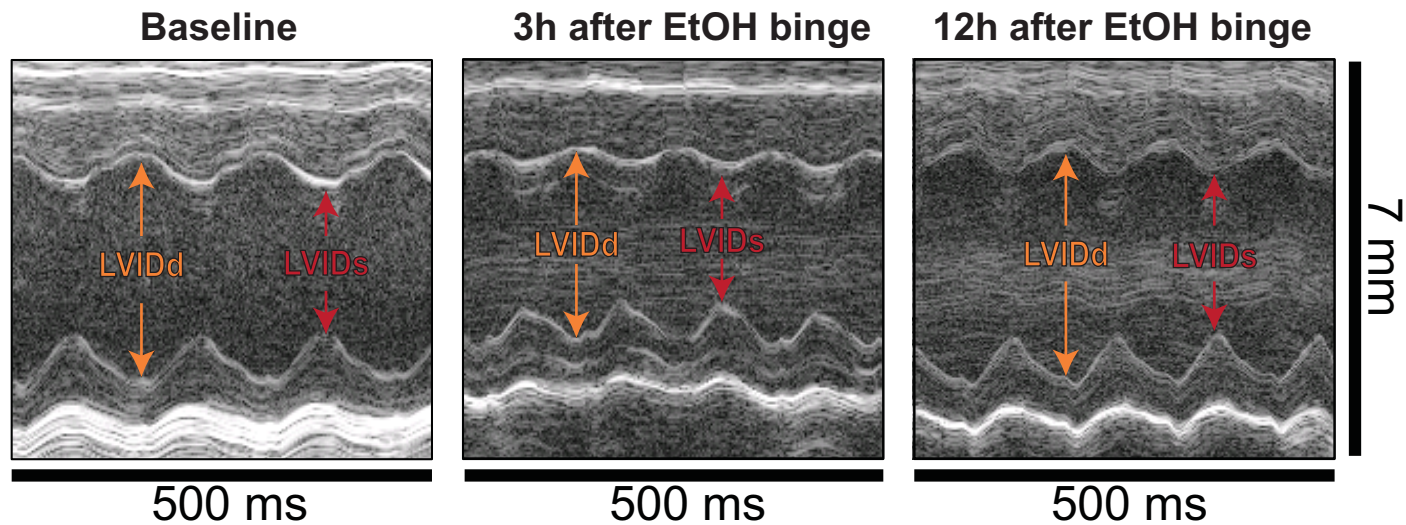

B

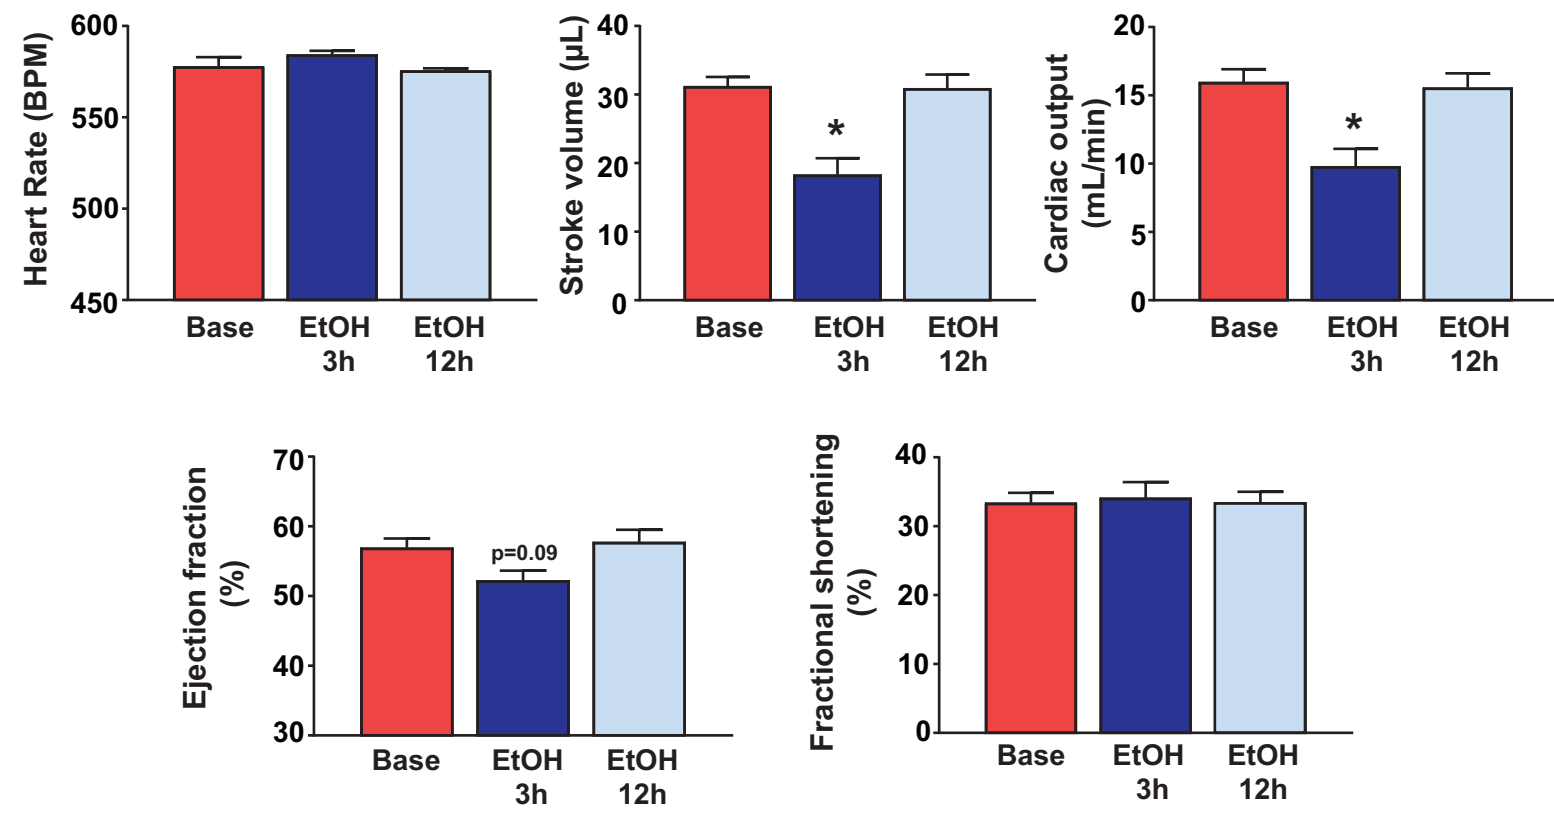

A

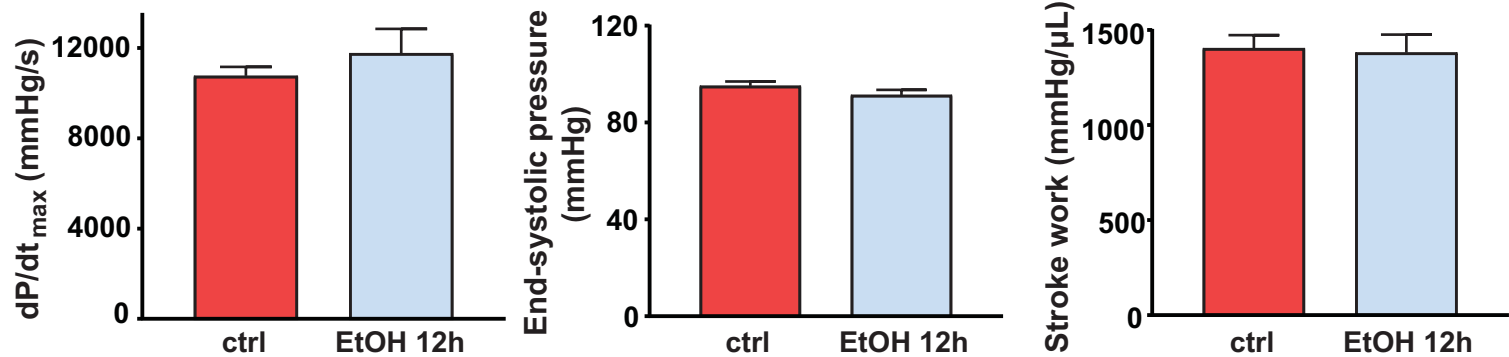

B

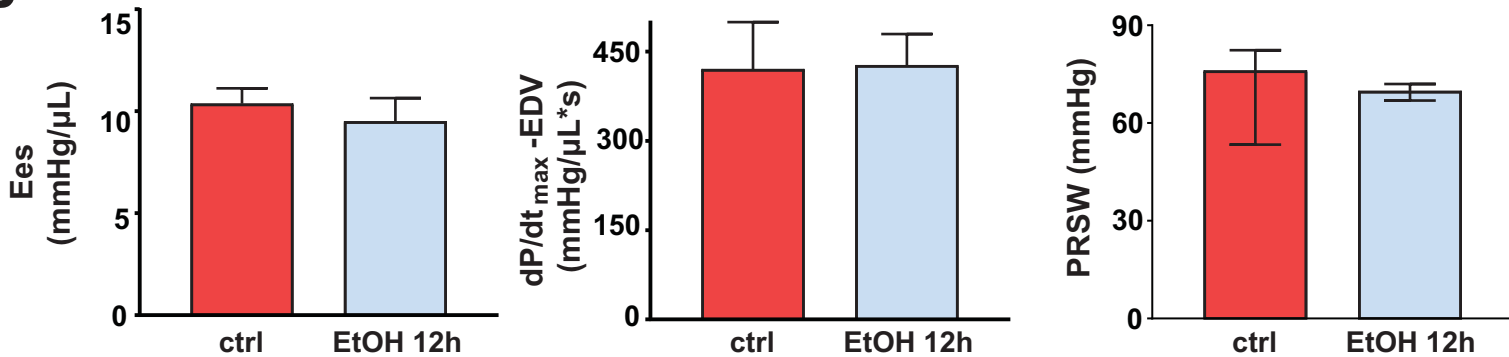

C

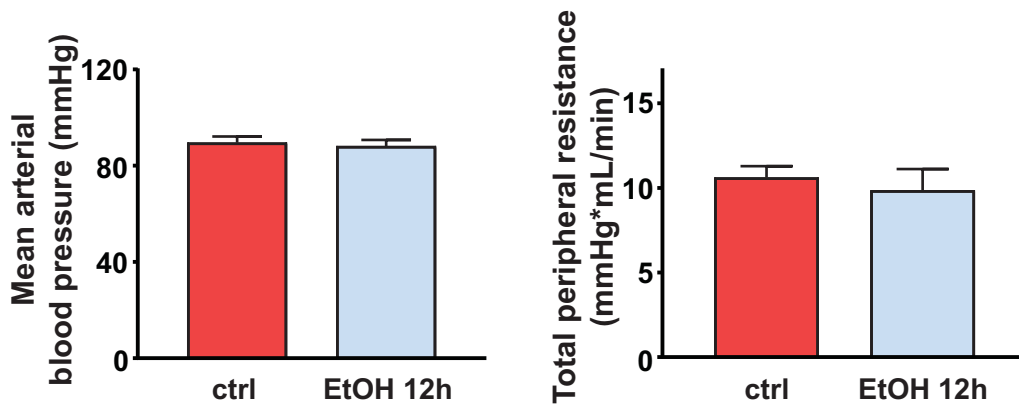

A

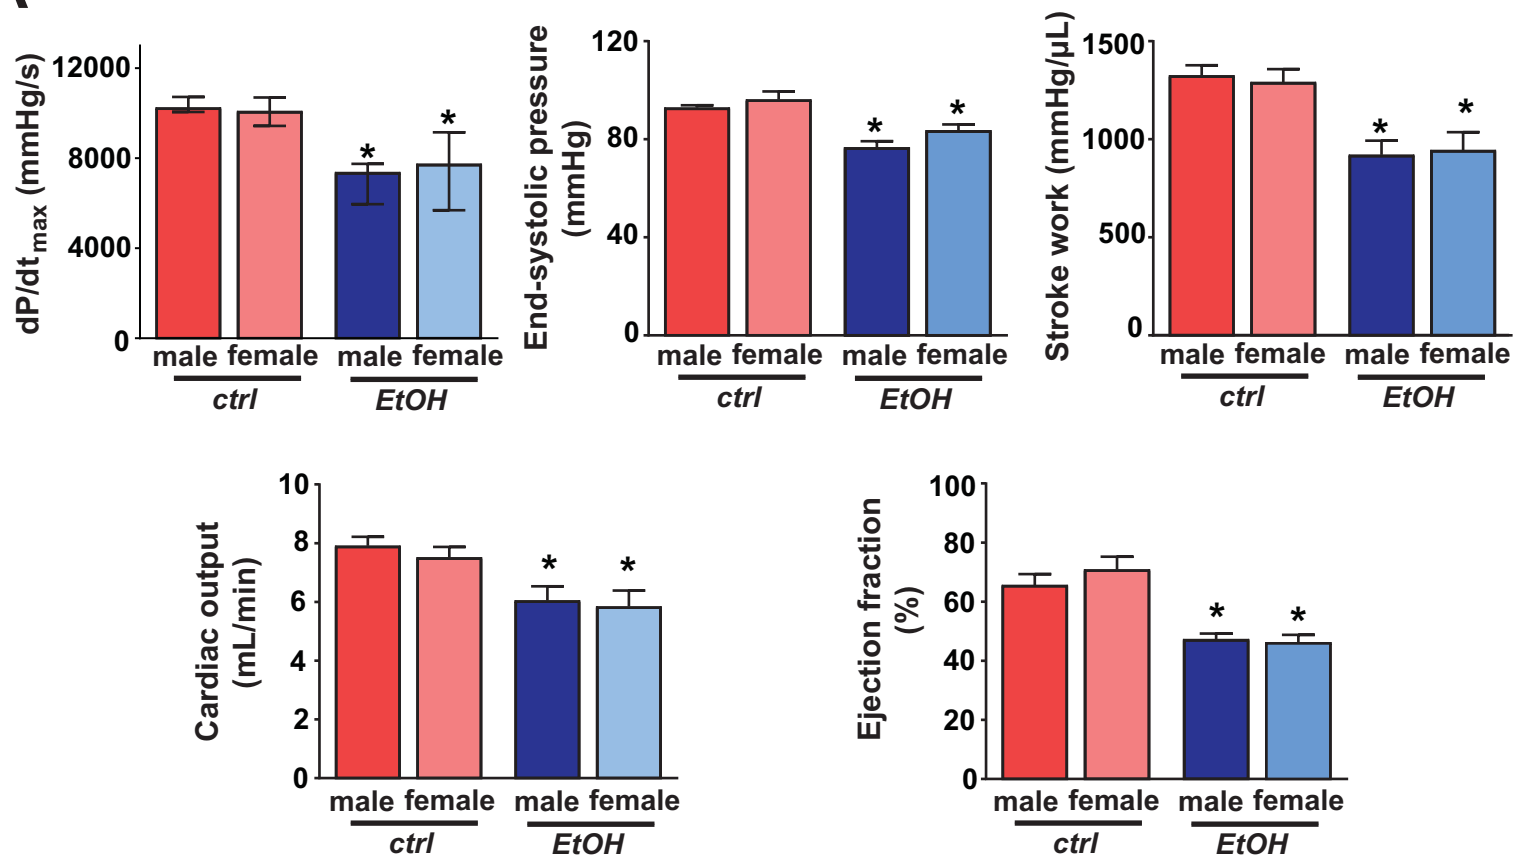

B

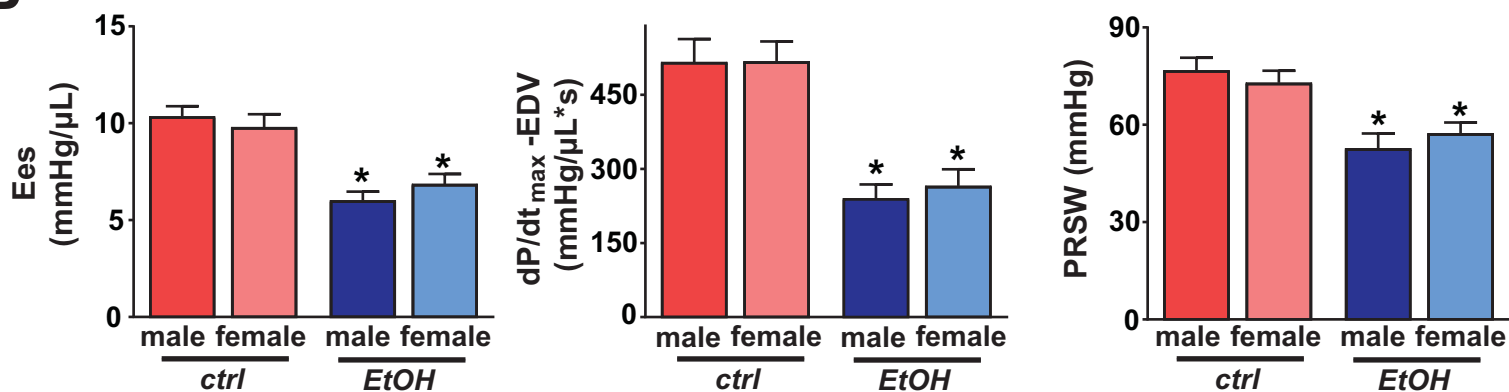

C

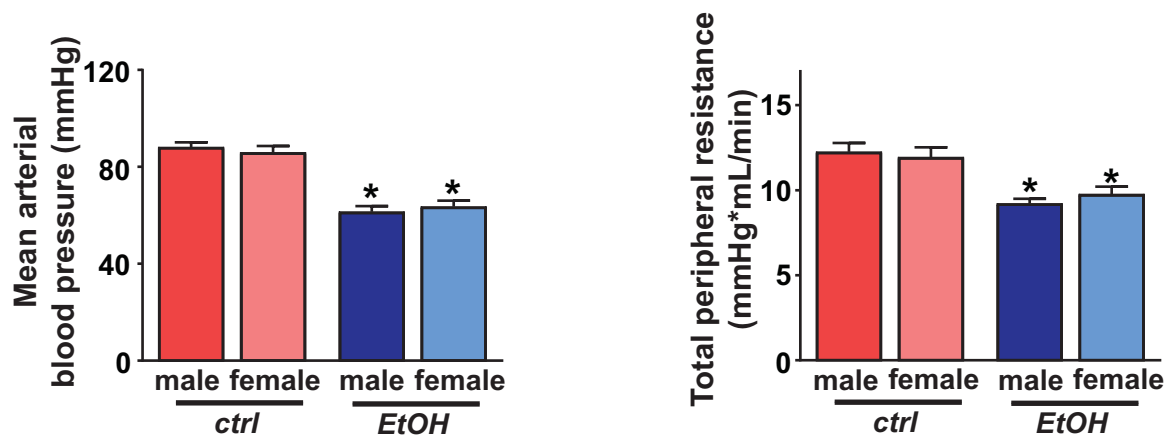

A

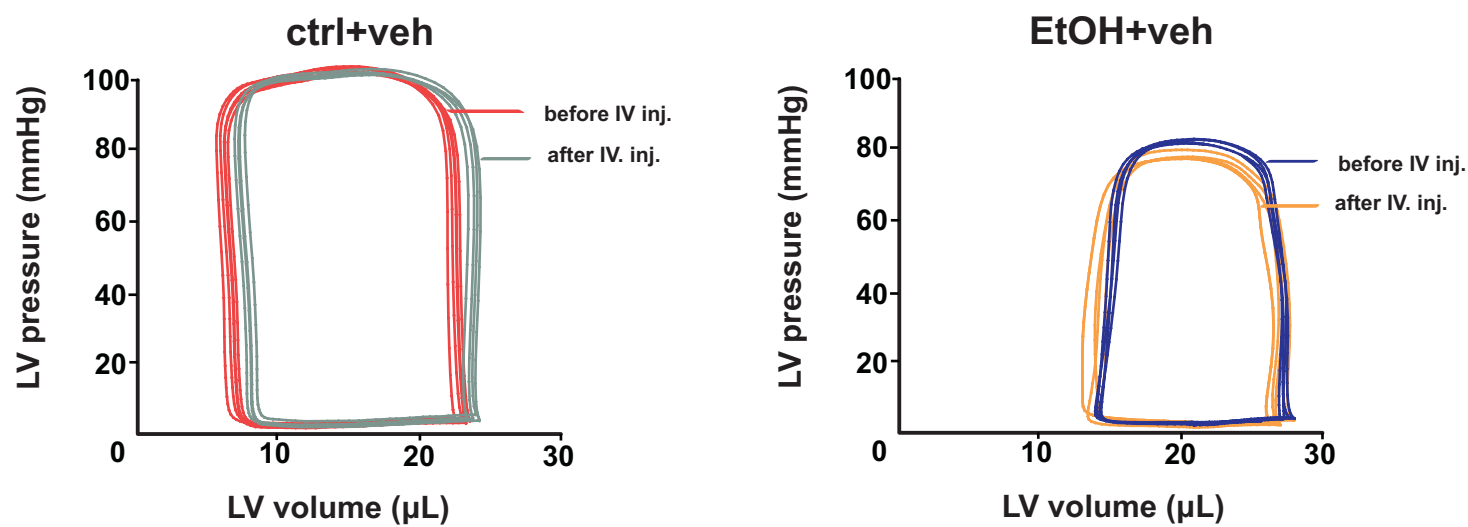

B

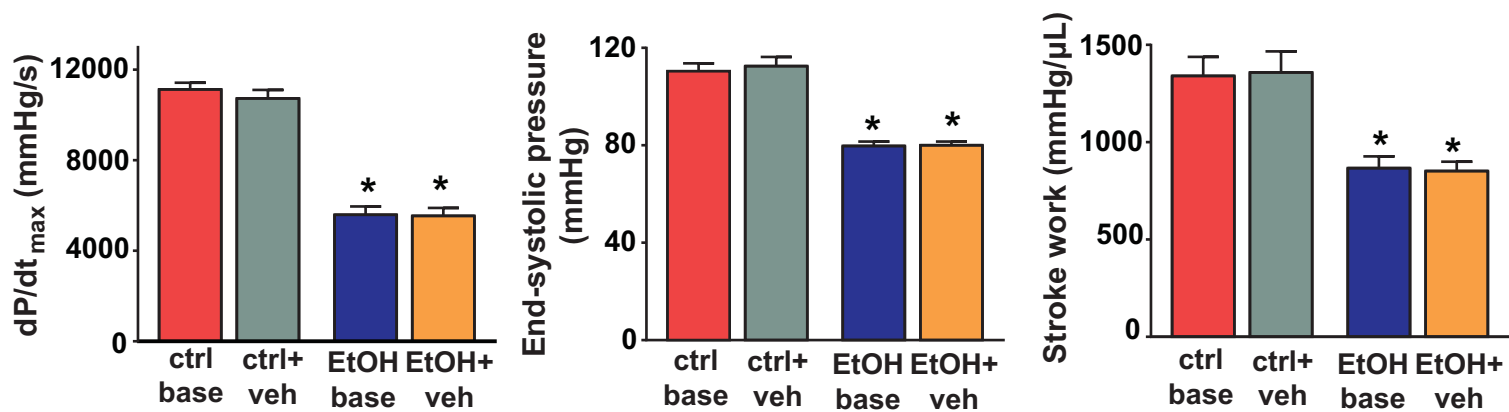

C

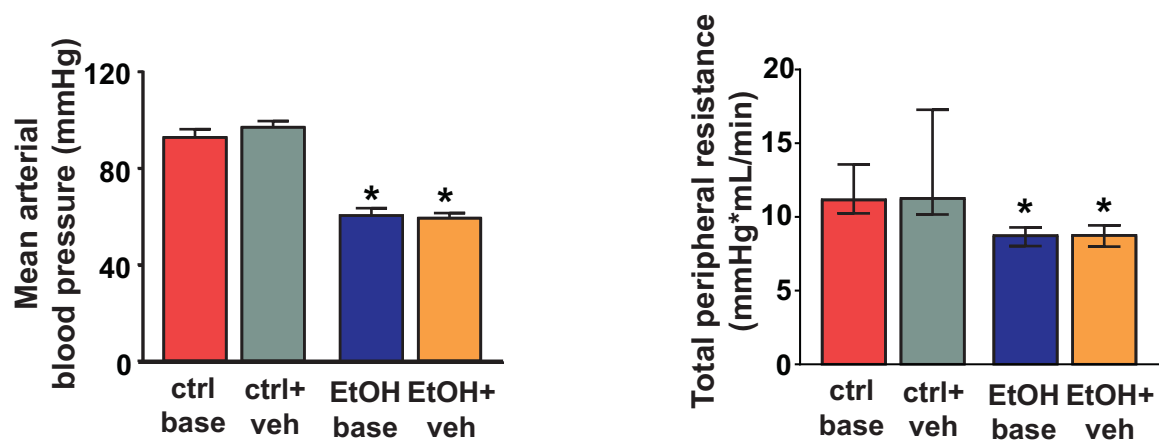

A

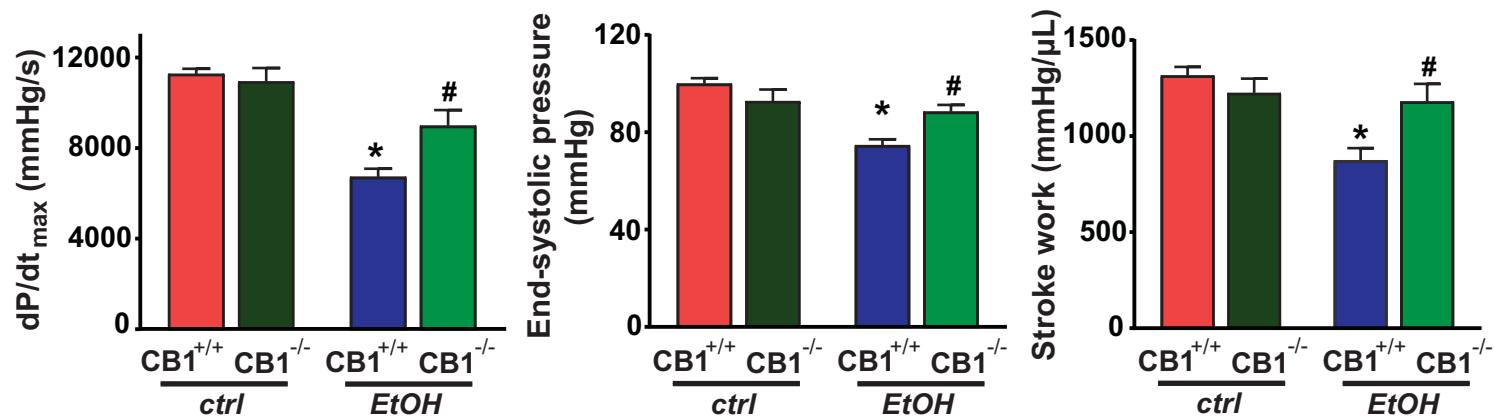

B

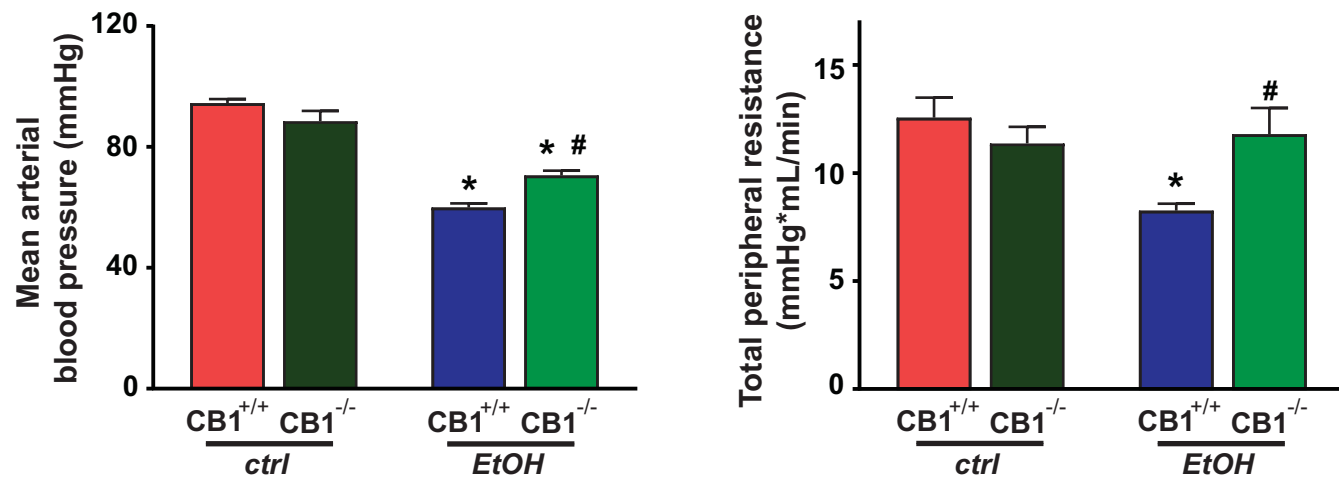

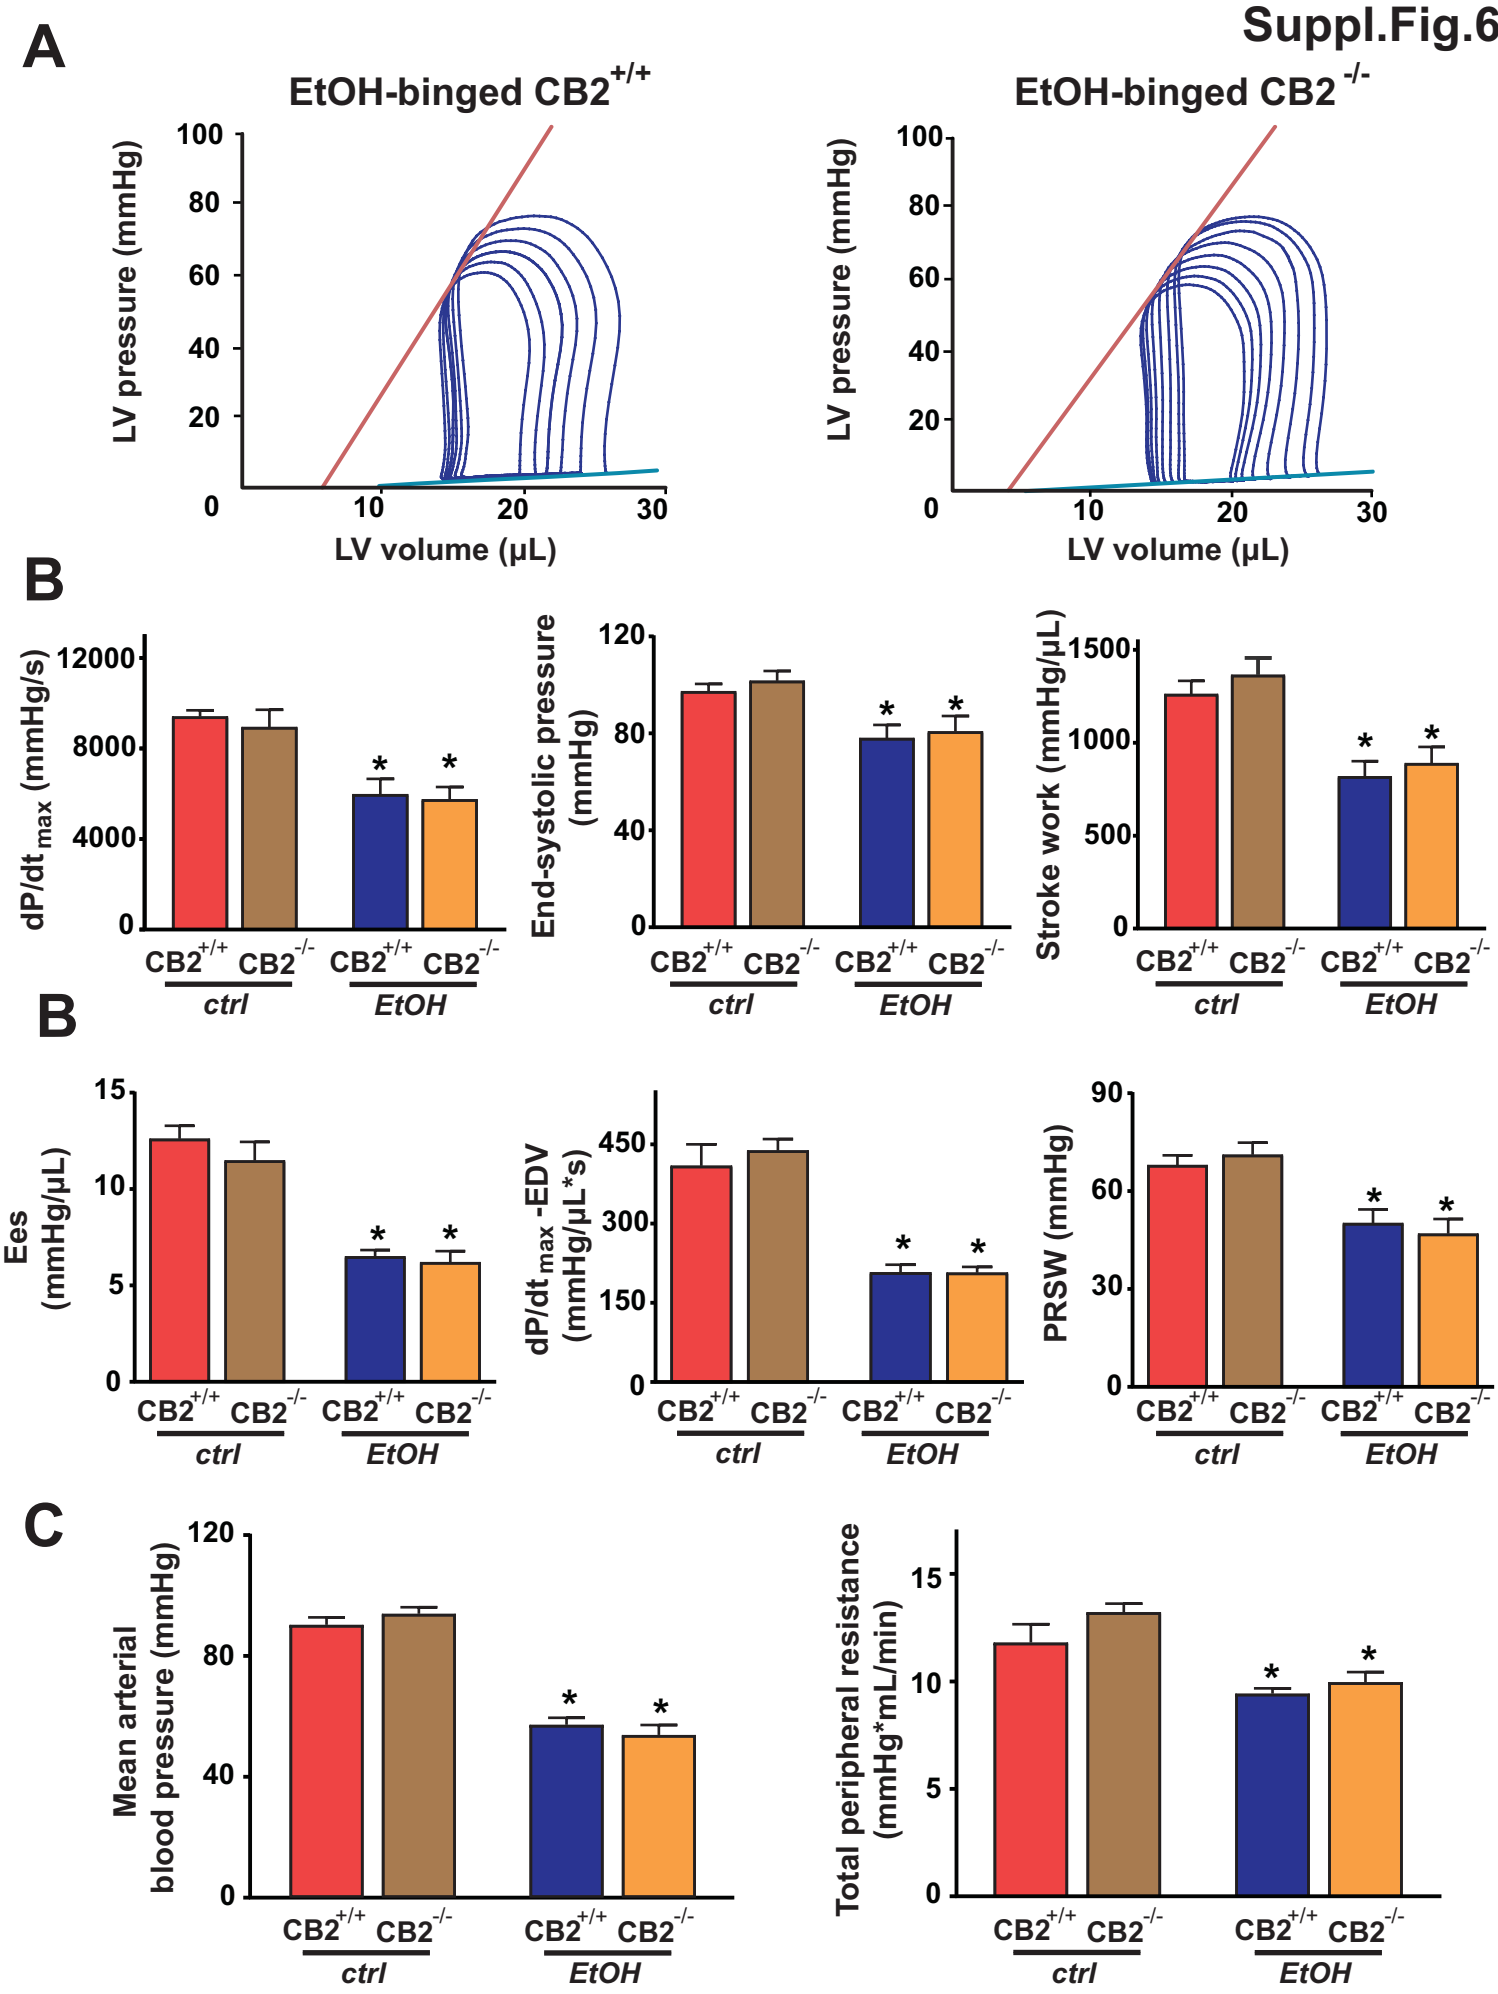

Supplement: mmc1.pdf [file mmc1.pdf]
